# Supplementary material for: Nut-like MOF/hydroxylated graphene hybrid materials for adsorptive desulfurization of thiophene
Source: Royal Society of Chemistry journal article supplement (doi:10.1039/c8ra03834a), 2018-01-01
Supplement: c8ra03834a1.pdf [file c8ra03834a1.pdf]

## Supplementary materials

### A Nut-like MOF/Hydroxylated Graphene Hybrid Materials for Adsorptive

#### Desulfurization of Thiophene

Ke YANG,<sup>\*a†</sup> Yu YAN,<sup>a†</sup> Wen CHEN,<sup>a</sup> Hongtao KANG,<sup>a</sup> Yi HAN,<sup>a</sup> Wenquan ZHANG,<sup>a</sup> Yafeng Fan<sup>a</sup> and Zhenxing LI<sup>\*a</sup>

*a State Key Laboratory of Heavy Oil Processing, Institute of New Energy, China University of Petroleum-Beijing, Beijing, 102249, P. R. China.*

*† These authors contributed equally.*

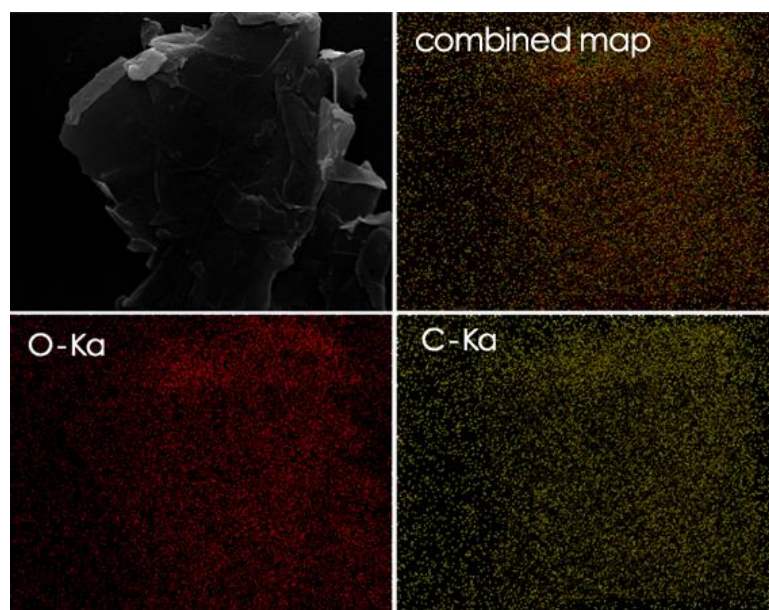

**Fig. S1** The SEM, EDS O-Kα (red) and C- Kα (yellow) images of HG.

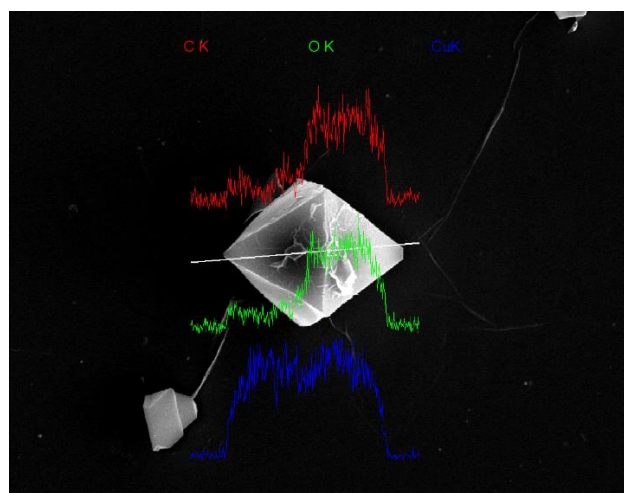

**Fig. S2** EDS line scanning and element content of Cu (blue), O (green) and C (red) for MGr-5 composite.

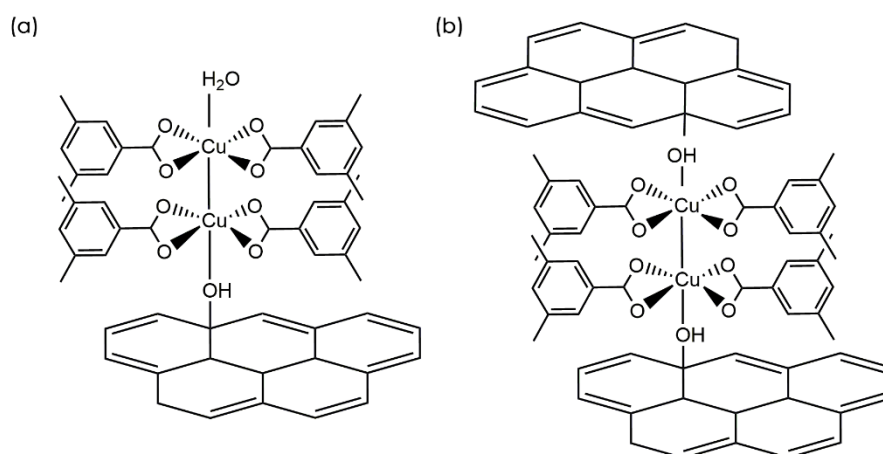

**Fig. S3** The possible interactions between Cu-BTC and hydroxyl groups of HG: (a) the HG dispersed on the surface of Cu-BTC crystal, and (b) the HG inserted inside Cu-BTC crystal to lead to the alternated growth of Cu-BTC and graphene layers.

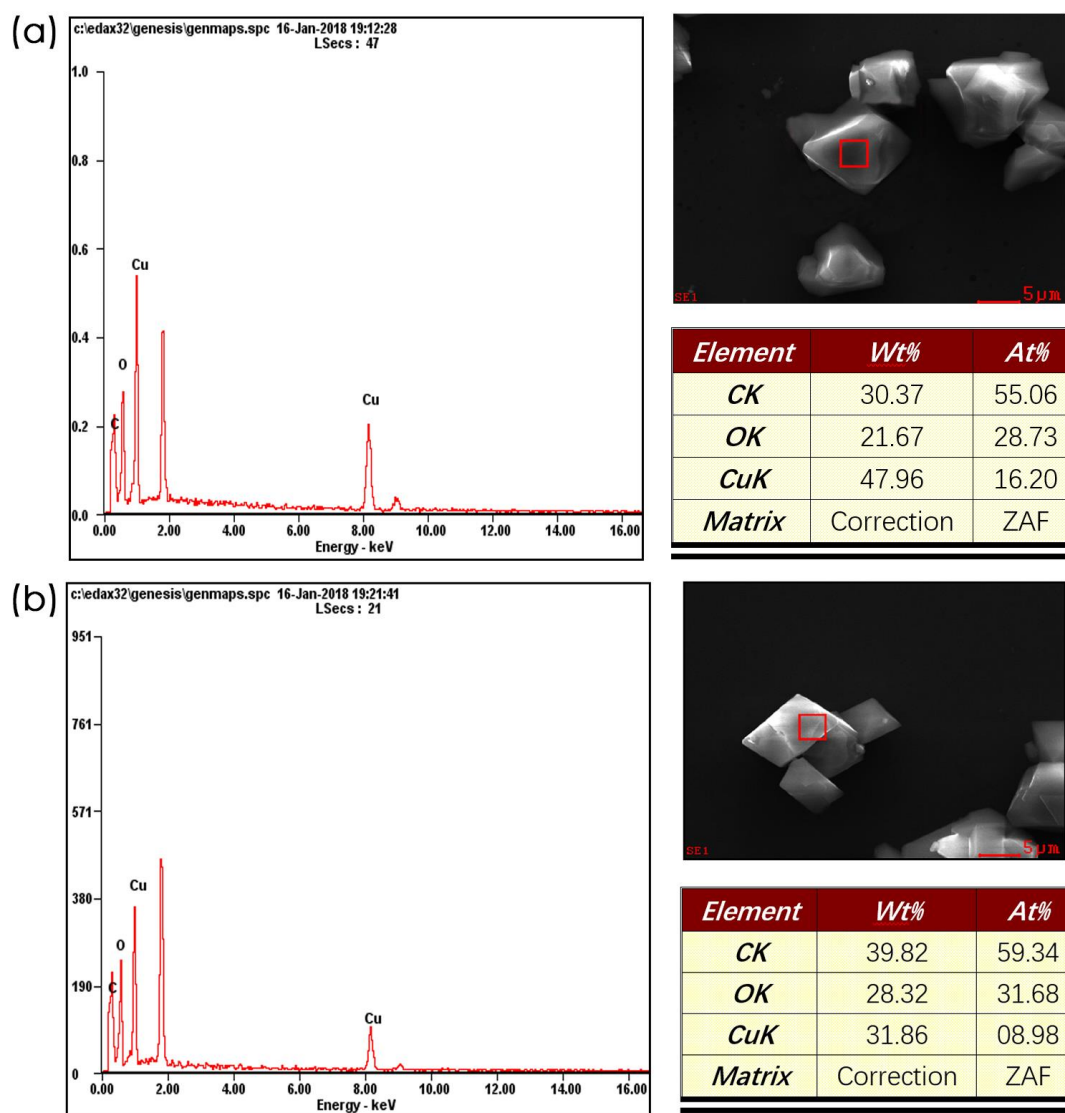

**Fig. S4** The EDS analyses for Cu-BTC and MGr-5 composite with elemental content of C, O and Cu in surface of material, respectively.

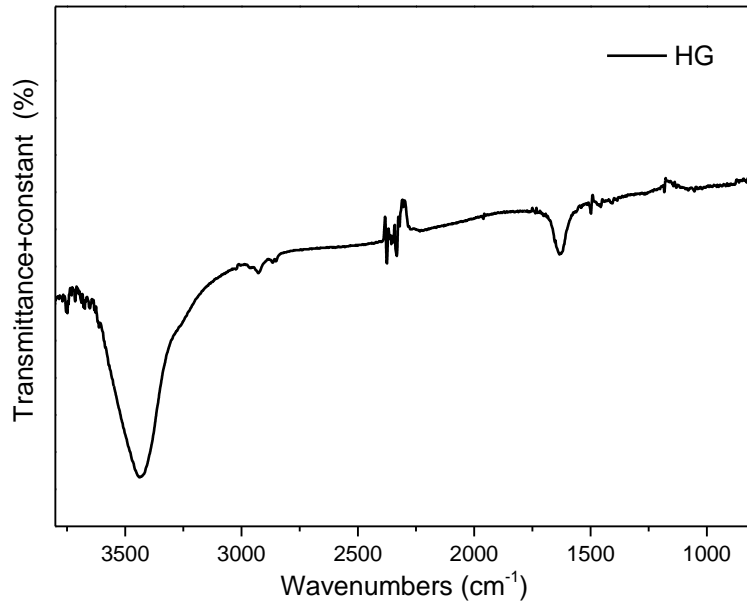

**Fig. S5.** The FT-IR spectrum of HG.

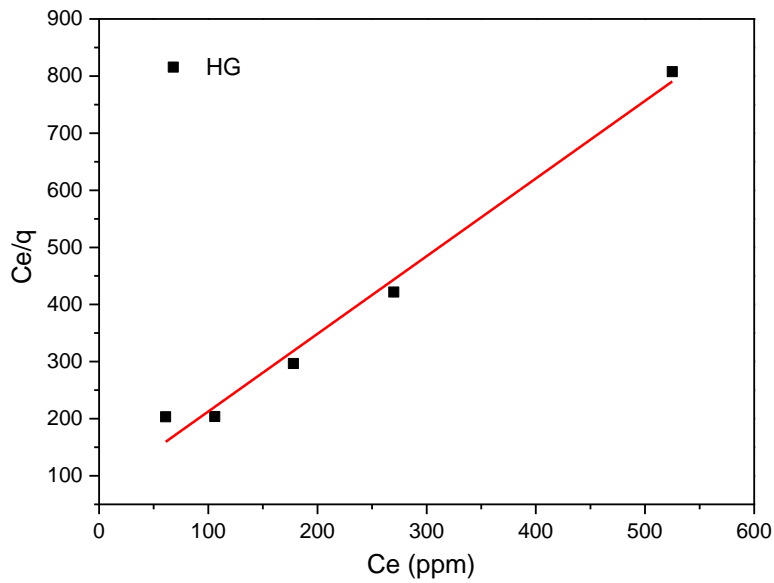

**Fig. S6.** The Langmuir plots for T adsorption by HG

*Calculation of maximum sulfur adsorption capacity (Q<sub>0</sub>):*

The maximum sulfur adsorption capacity of all samples were calculated according to the Langmuir adsorption isotherm. The linear form of Langmuir's isotherm mode was plotted by the following equation[1]:

$$\frac{C_e}{q} = \frac{C_e}{Q_0} + \frac{1}{Q_0 b}$$

Where,

C<sub>e</sub>: equilibrium sulfur concentration in model oils (ppm)

q : adsorption capacity of adsorbent (mg-S/g)

$Q_0$ : Langmuir constant (maximum sulfur adsorption capacity, mg-S/g )

$b$  : Langmuir constant (L/mg)

Thus, the maximum sulfur adsorption capacity can be gained by the reciprocal of the slope of the plot of  $C_e/q$  against  $C_e$ .

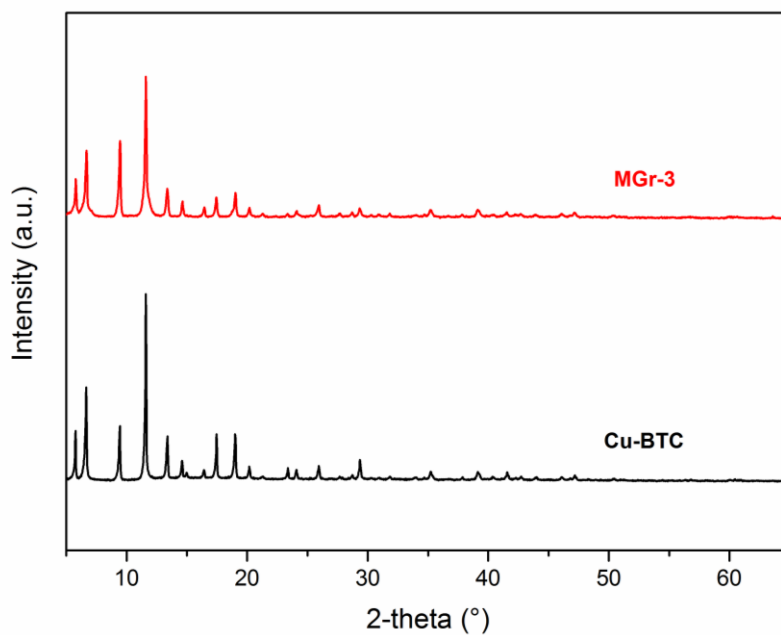

**Fig. S7.** The X-ray diffraction patterns of Cu-BTC and MGr-3 composite after fifth regeneration.

1. B.H. Hameed, D.K. Mahmoud, A.L. Ahmad, *Journal of hazardous materials*, 2008, **158** 65-72.
